# Supplementary material
Source: HighWire-hosted journal article supplement (https://jcp.bmj.com/content/71/9/781)
Supplement: inline-supplementary-material-1 [file inline-supplementary-material-1.docx]

**Appendix**

**Table S1 *Corynebacterium kroppenstedtii* and non-*kroppenstedtii Corynebacterium* species used as pure culture for comparing *C. kroppenstedtii* selective agar, blood agar and chocolate agar.**

| Bacteria isolates | Identifier | Source (site) |
| --- | --- | --- |
| *C. kroppenstedtii* | 104380354 | Clinical specimen (breast) |
| *C. kroppenstedtii* | 144380517 | Clinical specimen (breast) |
| *C. kroppenstedtii* | 094380167 | Clinical specimen (breast) |
| *C. kroppenstedtii* | 134380538 | Clinical specimen (breast) |
| *C. kroppenstedtii* | 134380785 | Clinical specimen (blood) |
| *C. kroppenstedtii* | DSM 44385 | Type strain |
| *C. tuberculostericum* | 244223 | Clinical specimen (skin) |
| *C. tuberculostericum* | 247010 | Clinical specimen (sputum) |
| *C. tuberculostericum* | 027727 | Clinical specimen (eye) |
| *C. tuberculostericum* | 028289 | Clinical specimen (female genital tract) |
| *C. tuberculostericum* | 000411 | Clinical specimen (female genital tract) |
| *C. macginleyi* | 285053 | Clinical specimen (eye) |
| *C. macginleyi* | 029171 | Clinical specimen (eye) |
| *C. urealyticum* | 2013 CAP | External quality assessment program strain |
| *C. urealyticum* | MM1214 | External quality assessment program strain |
| *C. urealyticum* | 189251 | Clinical specimen (urine) |
| *C. jeikeium* | 1207901 | Clinical specimen (surgical wound) |
| *C. jeikeium* | CAP D10 | External quality assessment program strain |
| *C. jeikeium* | CAP D02 | External quality assessment program strain |
| *C. resistens* | 238014 | Clinical specimen (sputum) |
| *C. resistens* | 241038.1 | Clinical specimen (buttock abscess) |
| *C. bovis* | 288284 | Clinical specimen (sputum) |
| *C. bovis* | 260197 | Clinical specimen (eye) |
| *C. accolens* | 268984 | Clinical specimen (sputum) |
| *C. accolens* | 244487 | Clinical specimen (anterior nares) |
| *C. accolens* | 253130 | Clinical specimen (anterior nares) |

**Table S2.** Routine media inoculated for each specimen type for aerobic bacterial culture.

| **Specimen type** | **Routine media inoculated for aerobic bacterial culture** |
| --- | --- |
| Respiratory specimens | |
| Nasal swab | BA, CHO |
| Oral swab/oral ulcer swab | BA, CHO |
| Throat swab | BA, CHO |
| Sputum | BA, CHO |
| Endotracheal/transbronchial aspirate, bronchoscopy specimens | BA, CHO, MAC |
| Miscellaneous specimens | |
| Superficial wound swab | BA, MAC |
| Deep wound swab | BA, CHO, MAC |
| Abscess/pus specimen | BA, MAC |
| Ear swab/discharge/middle and inner ear swab | BA, CHO, MAC |
| Eye swab | BA, CHO, MAC |
| Umbilical swab | BA, MAC |
| Hickman swab/exit site swab | BA, MAC |
| Endocervical swab/cervical swab, vaginal swab, vulval swab | BA, CHO, MAC, Thayer-Martin medium. |
| Sterile body fluid* | BA, CHO, MAC |

BA: Blood agar, CHO: Chocolate blood agar; MAC: MacConkey Agar.

* excluding blood, urine, central nervous system specimens.

**Figure 1S**

Colony morphology of *Lactobacillus acidophilus* on Blood agar (a), *C. kroppenstedtii* selective medium (b), compared with *C. striatum* (c) and *C. kroppenstedtii* (d)on *C. kroppenstedtii* selective medium after 72 hours incubation in condition 3 (24 hours in 35°C with 5% CO2 and 48 hours at 35°C in air).
